# Supplementary material for: High Risk of Viral Reactivation in Hepatitis B Patients with Systemic Lupus Erythematosus
Source: MDPI journal article supplement (doi:10.3390/ijms22179116), 2021-08-24
Supplement: s1 [file s1]

**Table S1.** Association of variables with outcome in 30 HBsAg-positive SLE patients during HBV reactivation.

| Variables                               | Living<br>N = 23 | Liver-Related Death<br>N = 7 | <i>p</i> -Value |
|-----------------------------------------|------------------|------------------------------|-----------------|
| Age at HBVr (years)                     | 47 (25–80)       | 55 (25–64)                   | 0.746           |
| Female                                  | 16 (69.6)        | 5 (71.4)                     | 1.000           |
| Peak TBIL during reactivation (mg/dL)   | 1.1 (0.3–6.3)    | 30.4 (3.1–40.4)              | <0.001 *        |
| Peak ALT during reactivation (IU/mL)    | 280 (102–1015)   | 368 (103–8310)               | 0.784           |
| Any glucocorticoid containing regiments | 19 (82.6)        | 6 (85.7)                     | 1.000           |
| Anti-viral treatment, n (%)             | 20 (87.0)        | 6 (85.7)                     | 1.000           |

Abbreviations: ALT, alanine aminotransferase; TBIL, total bilirubin. Data are presented as frequency (percentage), mean ± standard deviation, or median (interquartile range). \*  $p < 0.05$ .

**Table S2.** Logistic-regression analysis of independent predictors of survival in 30 HBsAg-positive SLE patients during HBV reactivation.

| Predictors                              | Total (n = 30)<br>Number (%) | Liver-Related<br>Death (n = 7)<br>Number (%) | Crude OR<br>(95% CI) | <i>p</i> -Value | Adjusted OR <sup>†</sup><br>(95% CI) | <i>p</i> -Value |
|-----------------------------------------|------------------------------|----------------------------------------------|----------------------|-----------------|--------------------------------------|-----------------|
| Age at HBVr (years)                     |                              |                                              |                      |                 |                                      |                 |
| <55 years                               | 21 (70.0)                    | 3 (42.9)                                     | 1.00                 |                 | 1.00                                 |                 |
| ≥55 years                               | 9 (30.0)                     | 4 (57.1)                                     | 4.80 (0.80–28.90)    | 0.087           | 2.39 (0.12–48.00)                    | 0.570           |
| Gender                                  |                              |                                              |                      |                 |                                      |                 |
| Male                                    | 9 (30.0)                     | 2 (28.6)                                     | 1.00                 |                 |                                      |                 |
| Female                                  | 21 (70.0)                    | 5 (71.4)                                     | 0.91 (0.14–5.90)     | 0.925           |                                      |                 |
| Peak TBIL (mg/dL)                       |                              |                                              |                      |                 |                                      |                 |
| <5 mg/dL                                | 23 (76.7)                    | 1 (14.3)                                     | 1.00                 |                 | 1.00                                 |                 |
| ≥5 mg/dL                                | 7 (23.3)                     | 6 (85.7)                                     | 132.0 (7.15–2435.47) | 0.001 *         | 110.78 (5.85–2097.68)                | 0.002 *         |
| Any glucocorticoid containing regiments |                              |                                              |                      |                 |                                      |                 |
| No                                      | 5 (16.7)                     | 1 (14.3)                                     | 1                    |                 |                                      |                 |
| Yes                                     | 25 (83.3)                    | 6 (85.7)                                     | 1.26 (0.12–13.59)    | 0.847           |                                      |                 |

Abbreviations: CI, confidence interval; OR, odds ratio; TBIL, total bilirubin. <sup>†</sup> OR and 95% CI adjusted for all other variables in the table. \*  $p < 0.05$ .
